# Supplementary material
Source: HighWire-hosted journal article supplement (http://www.cmaj.ca/highwire/filestream/59498/field_highwire_adjunct_files/1/150579-res-2-at.pdf)
Supplement: 150579-res-2-at.pdf [file 150579-res-2-at.pdf]

| <b>Appendix 2 (as supplied by the authors):</b> Primary care billing codes used to assign non-enrolled patients to a primary care physician |                                                                      |
|---------------------------------------------------------------------------------------------------------------------------------------------|----------------------------------------------------------------------|
| Billing Code                                                                                                                                | Description                                                          |
| A001                                                                                                                                        | Minor Assessment                                                     |
| A003                                                                                                                                        | General Assessment                                                   |
| A007                                                                                                                                        | Intermediate Assessment                                              |
| A903                                                                                                                                        | Pre-dental General Assess. FP/GP                                     |
| E075                                                                                                                                        | Geriatric General Assessment Premium                                 |
| G212                                                                                                                                        | Allergy-hyposens injection (G700+G202) (sole reason visit)           |
| G271                                                                                                                                        | Cardiovascular/Anticoagulation supervision (max one per month)       |
| G372                                                                                                                                        | Injection/infusion intramuscular/subcutaneous/intradermal with visit |
| G373                                                                                                                                        | Injection/infusion as G372 but sole reason for visit, 1st injection  |
| G365                                                                                                                                        | Pap Tests                                                            |
| G538                                                                                                                                        | Each Individual Injection with non-influenza agents                  |
| G539                                                                                                                                        | Injection of unspecified agent - sole reason (first injection)       |
| G590                                                                                                                                        | Influenza agent – with visit                                         |
| G591                                                                                                                                        | Influenza agent – sole reason                                        |
| K005                                                                                                                                        | Primary Mental Health Care – Individual Care                         |
| K013                                                                                                                                        | Educational Counseling – Individual Care                             |
| K017                                                                                                                                        | Annual Health Exam – Child after second birthday                     |
| P004                                                                                                                                        | Minor Prenatal Assessment                                            |

Appendix to: Kiran T, Kopp A, Moineddin R, et al. Longitudinal evaluation of physician payment reform and team-based care for chronic disease management and prevention. *CMAJ* 2015. DOI:10.1503/cmaj.150579.

Copyright © 2015 The Author(s) or their employer(s).

To receive this resource in an accessible format, please contact us at [cmajgroup@cmaj.ca](mailto:cmajgroup@cmaj.ca)
